# Supplementary material for: Patient-Community Perspectives on Real-World Evidence: Enhancing Engagement, Understanding, and Trust
Source: PubMed Central journal article supplement — Patient. 2019 Jan 22;12(4):375–81. doi: 10.1007/s40271-019-00356-z (PMC6598955; doi:10.1007/s40271-019-00356-z), 2019-01-22
Supplement: 40271_2019_356_MOESM3_ESM.pdf [file 40271_2019_356_MOESM3_ESM.pdf]

### ***Supplementary Materials 3 - Discussion questions***

#### **Patient Perspectives on Real-World Evidence (RWE)**

- How do patients define RWE?
- Do they define it differently than other stakeholders?
- What questions do patients have about RWE and how it is used?
- Are there concerns about RWE? Are there “acceptable uses” versus “unacceptable uses” from the patient perspective?

#### **Communicating Real-World Evidence to Patients**

- How can RWE be effectively communicated to provide value to patients?
- What do patients need to know to trust RWE?
- What are the barriers and challenges?
- What characteristics does RWE need to have to enable patients to use it in their own decision-making?
- What characteristics does RWE need to have to allow patients to feel comfortable for others (e.g., clinical practice guideline groups, payers, regulators, etc.) to use it in their decision-making? For themselves to use it?
